# Supplementary material for: Negative Regulators of Insulin Signaling Revealed in a Genome-Wide Functional Screen
Source: PubMed Central journal article supplement (PMC2731165; doi:10.1371/journal.pone.0006871), 2009-09-03
Supplement: pone.0006871.s001.pdf [file pone.0006871.s001.pdf]

**Figure S1**

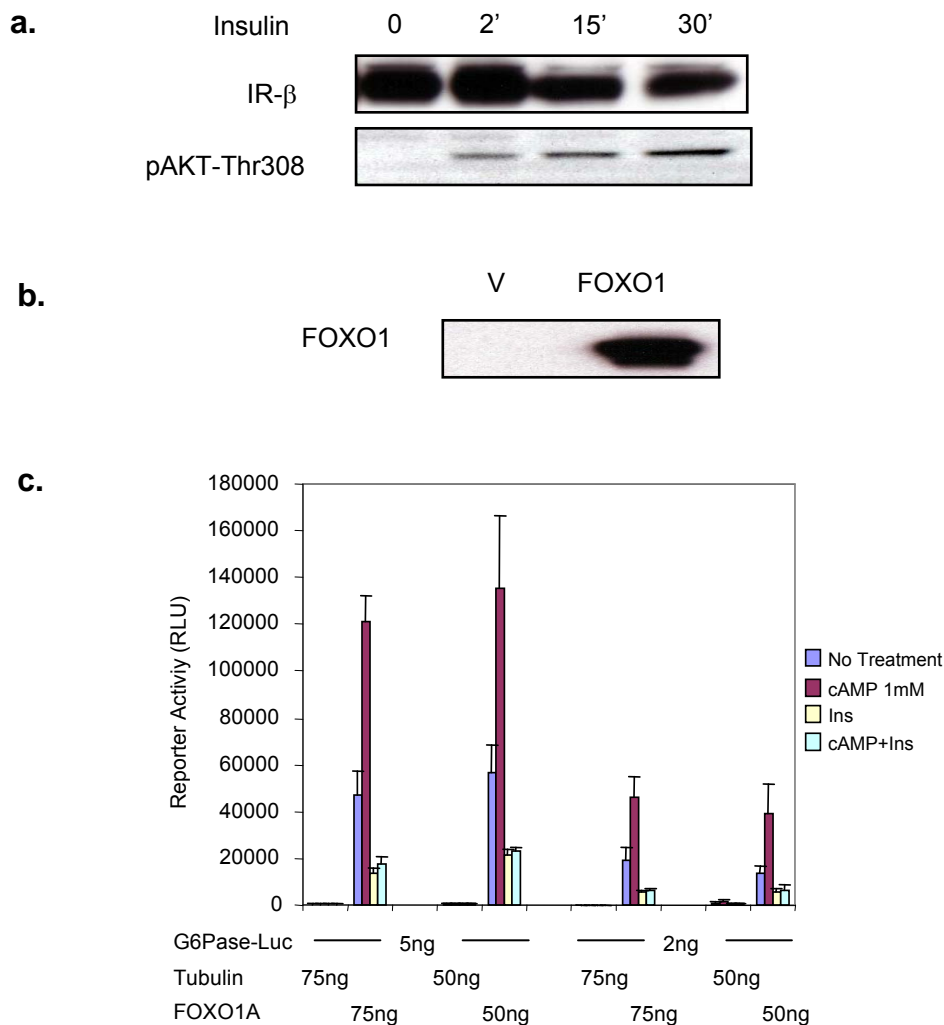

**Fig S1. CHO-K1 cells are responsive to insulin stimulation and express an insignificant amount of endogenous FOXO1A transcription factor** (a) CHO-K1 cells were treated with 100 nM insulin for the times indicated and analyzed for AKT phosphorylation and total IR expression by western blot. (b) Expression level of FOXO1A in CHO-K1 cells. Human FOXO1A cDNA and the vector control were transfected into CHO-K1 cells and allowed to express for 48 hours. Cell extracts were taken and analyzed by Western blotting using anti-FKHR (Cell Signaling Technology, Beverly, MA) as primary antibody. (c) G6Pase-Luc reporter is inactive in CHO-K1 cells without exogenous expression of FOXO1A. CHO-K1 cells were co-transfected with 2 ng or 5 ng of G6Pase-Luc and 50ng or 75ng of  $\alpha$ -tubulin (negative control) or FOXO1A. Insulin and cAMP stimulations were performed as described in Methods.
