# Supplementary material for: Negative Regulators of Insulin Signaling Revealed in a Genome-Wide Functional Screen
Source: PubMed Central journal article supplement (PMC2731165; doi:10.1371/journal.pone.0006871), 2009-09-03
Supplement: pone.0006871.s002.pdf [file pone.0006871.s002.pdf]

Figure S2

Experiment 1

Experiment 2

Experiment 3/Experiment 4

n.d.

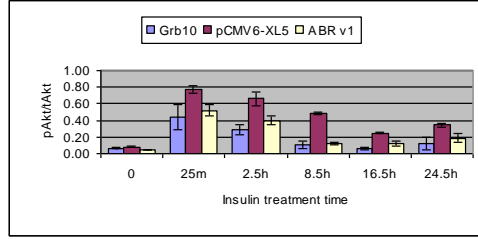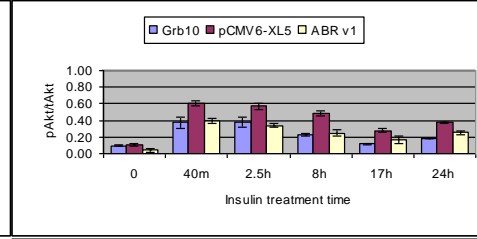

n.d.

n.d.

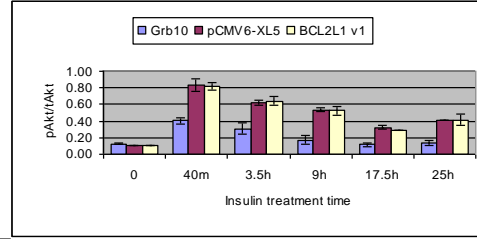

n.d.

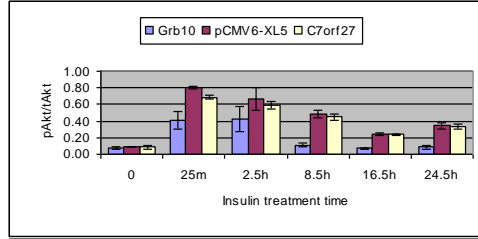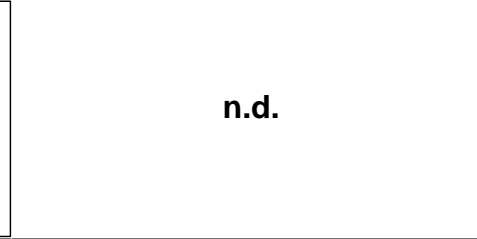

n.d.

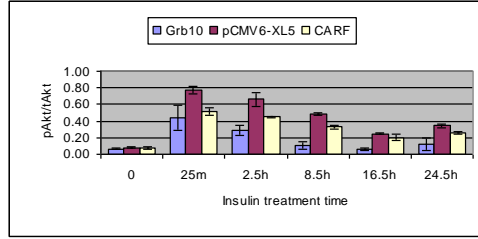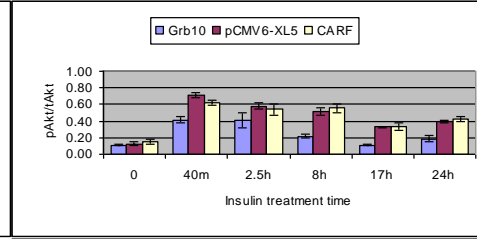

n.d.

n.d.

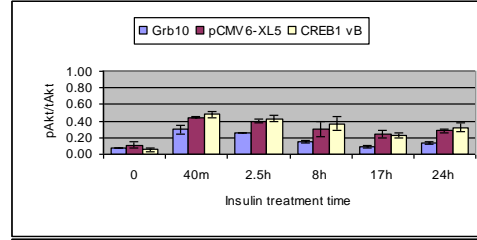

n.d.

n.d.

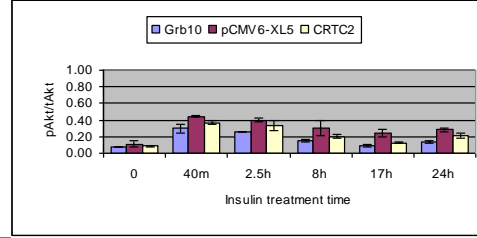

n.d.

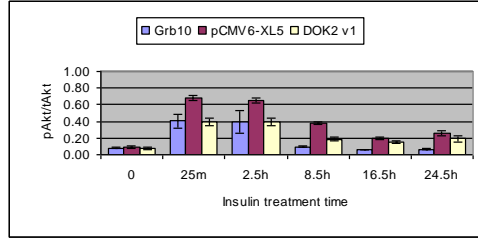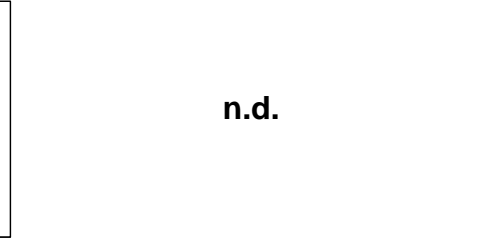

n.d.

**Figure S2**

**Experiment 1**

**Experiment 2**

**Experiment 3/Experiment 4**

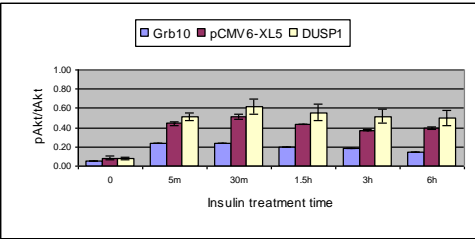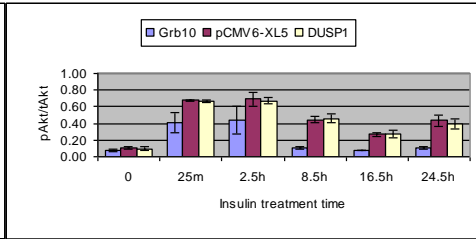

n.d.

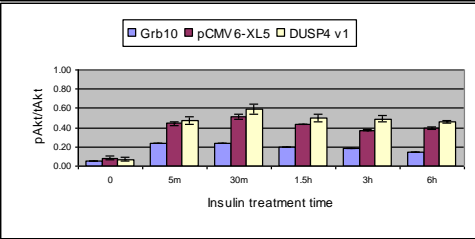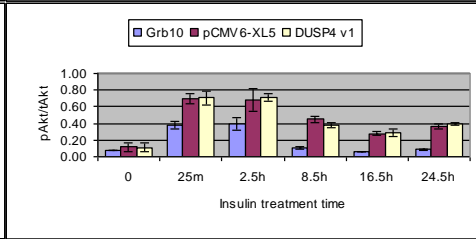

n.d.

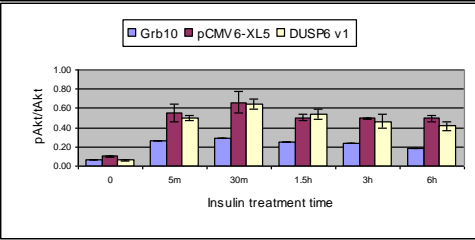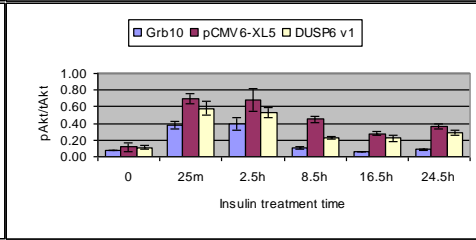

n.d.

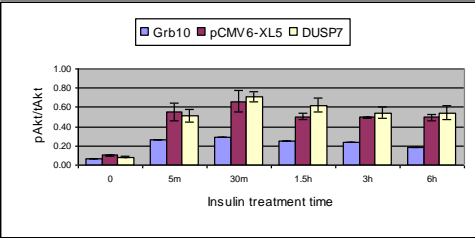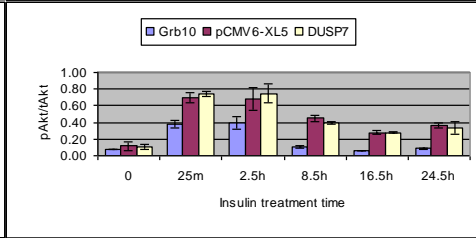

n.d.

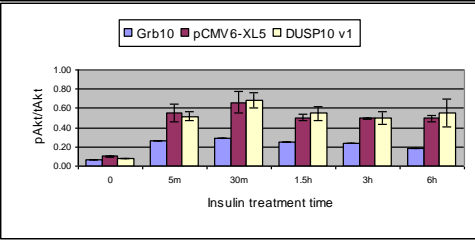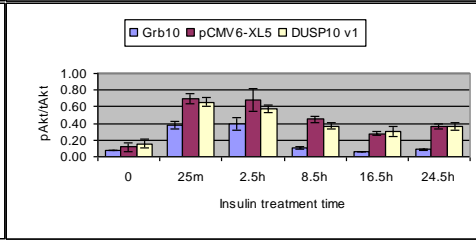

n.d.

n.d.

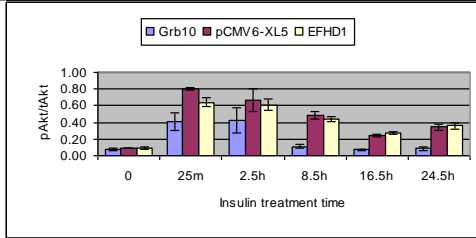

n.d.

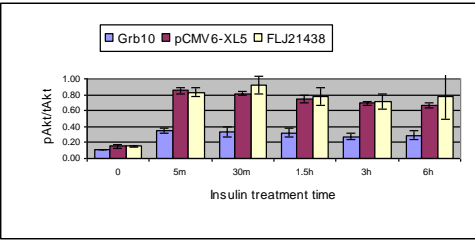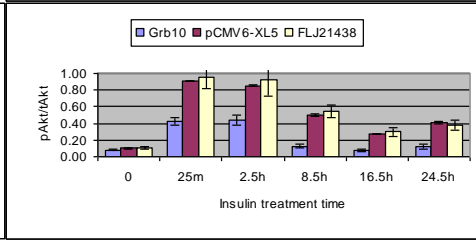

n.d.

Figure S2

**Experiment 1**

**Experiment 2**

**Experiment 3/Experiment 4**

n.d.

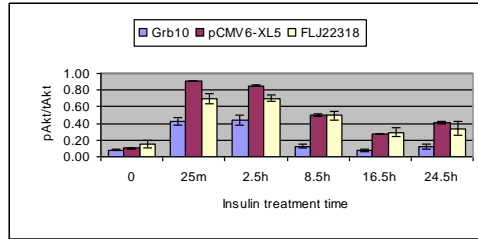

n.d.

n.d.

n.d.

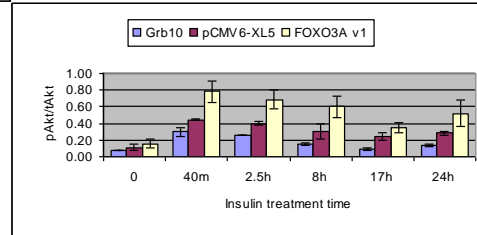

n.d.

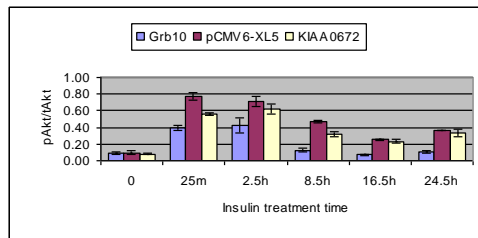

n.d.

n.d.

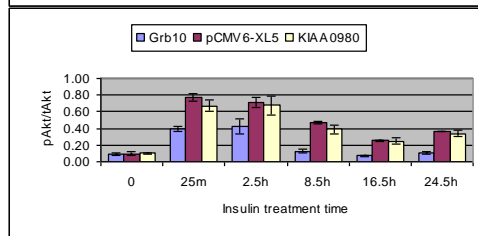

n.d.

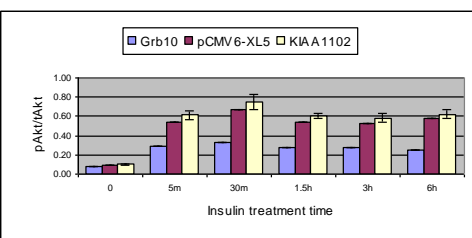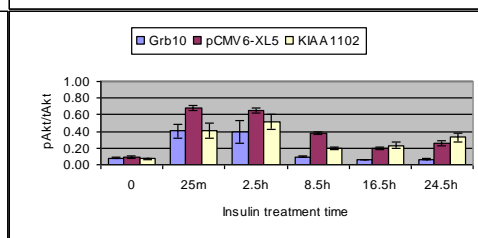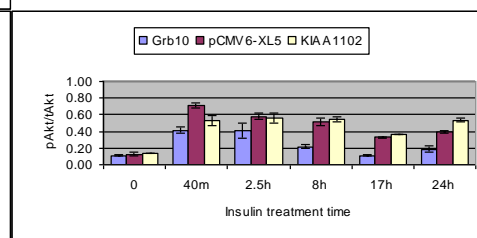

n.d.

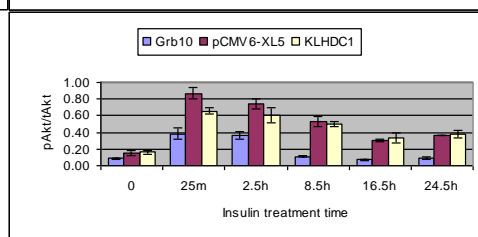

n.d.

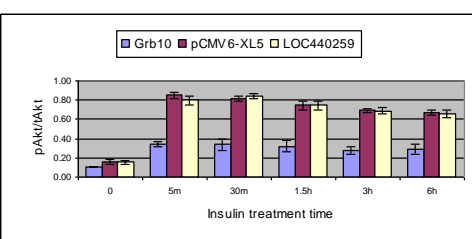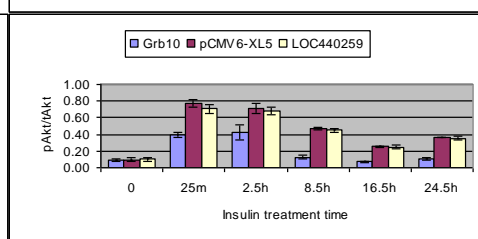

n.d.

**Figure S2**

**Experiment 1**

**Experiment 2**

**Experiment 3/Experiment 4**

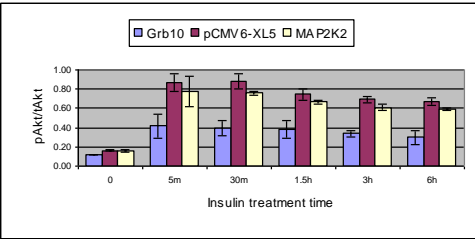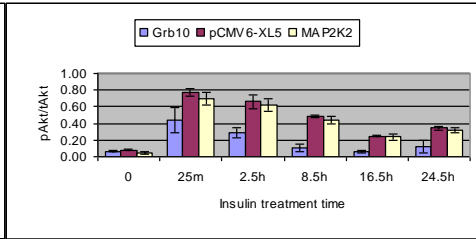

n.d.

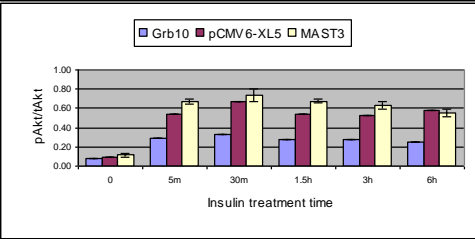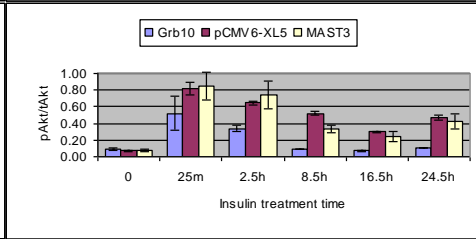

n.d.

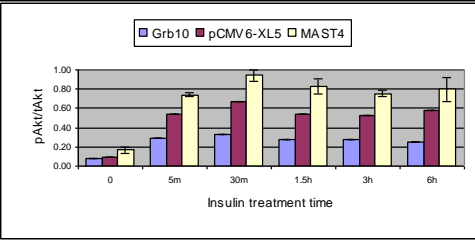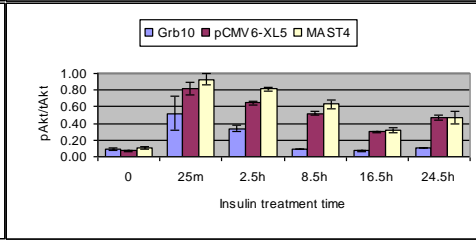

n.d.

n.d.

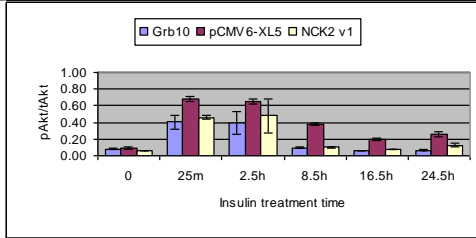

n.d.

n.d.

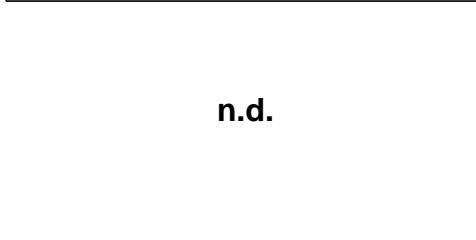

n.d.

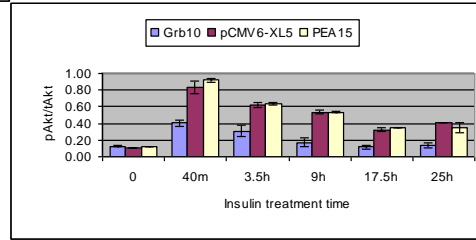

n.d.

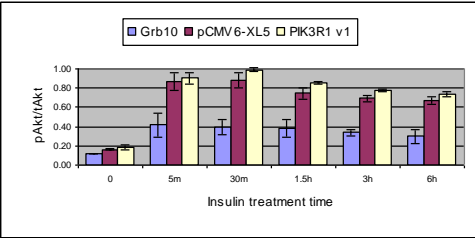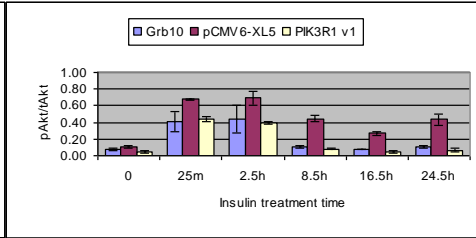

n.d.

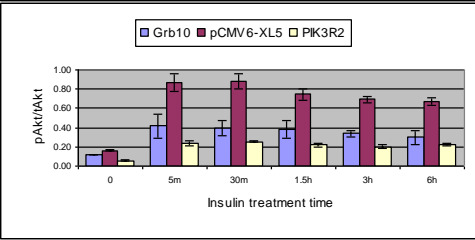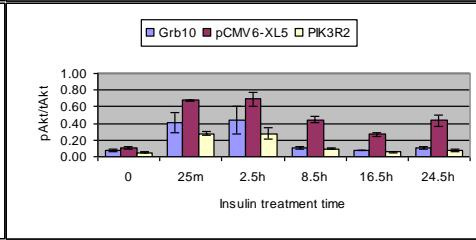

Figure S2

Experiment 1

Experiment 2

Experiment 3/Experiment 4

n.d.

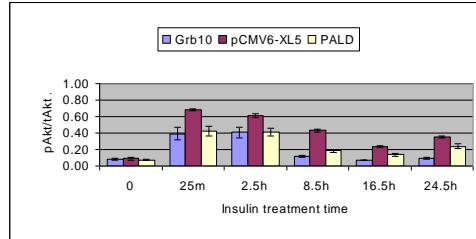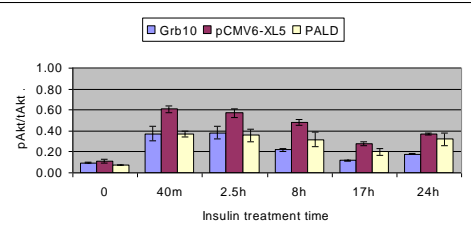

n.d.

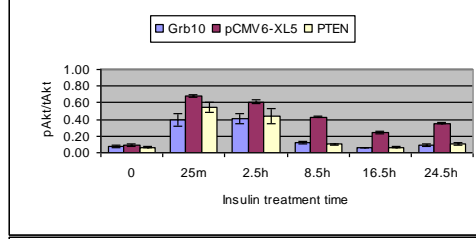

n.d.

n.d.

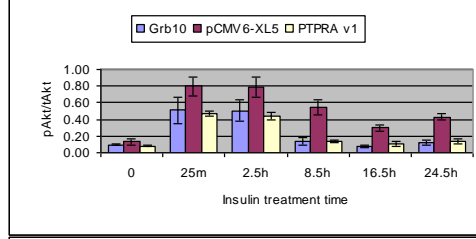

n.d.

n.d.

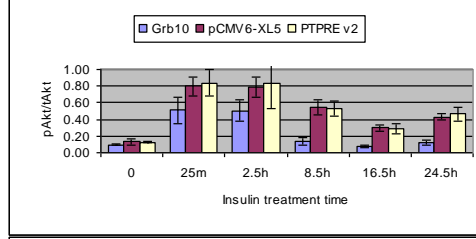

n.d.

n.d.

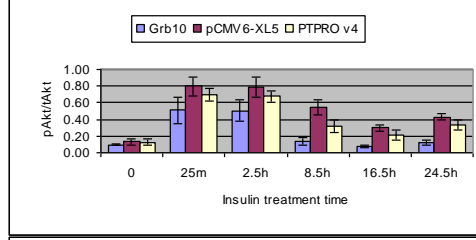

n.d.

n.d.

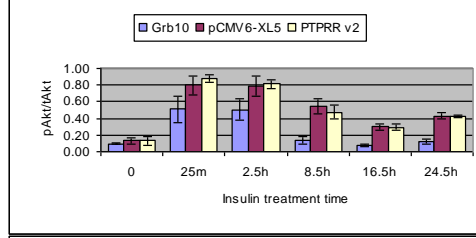

n.d.

n.d.

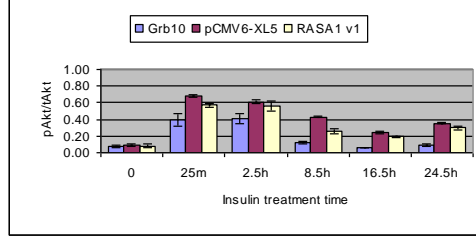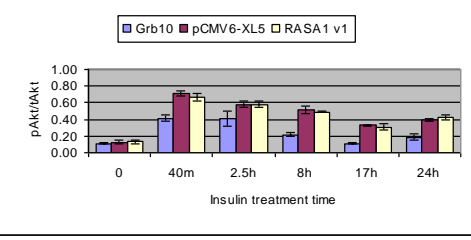

**Figure S2**

**Experiment 1**

**Experiment 2**

**Experiment 3/Experiment 4**

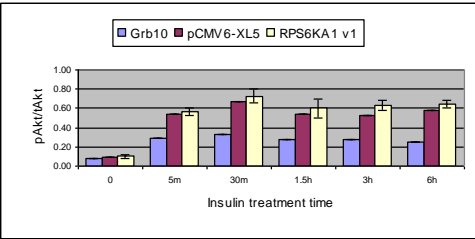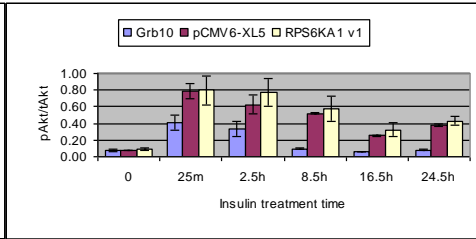

n.d.

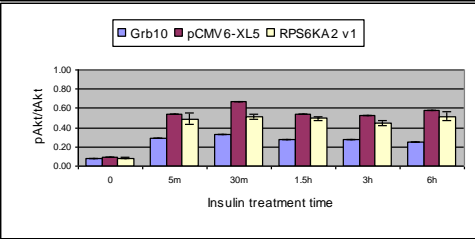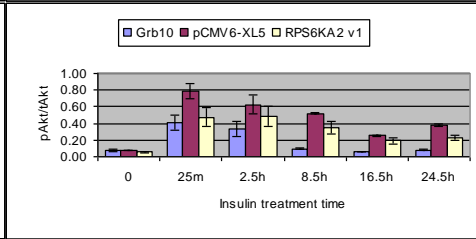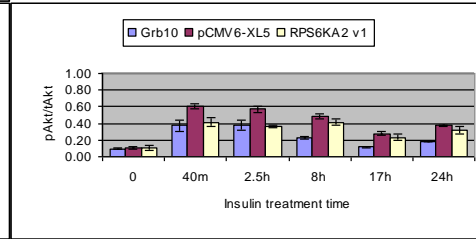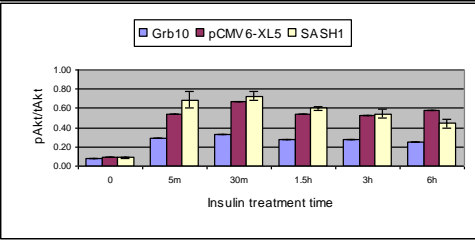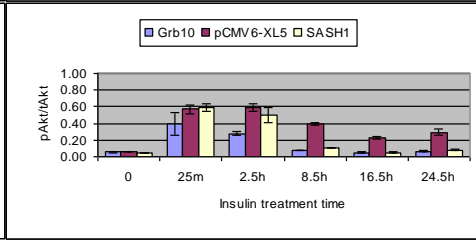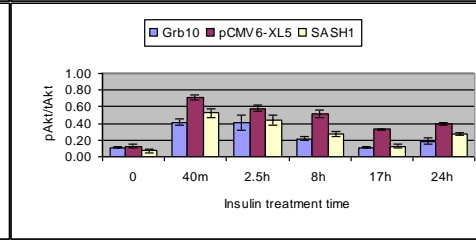

n.d.

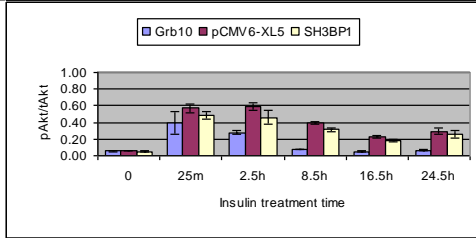

n.d.

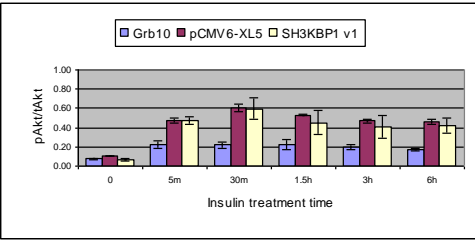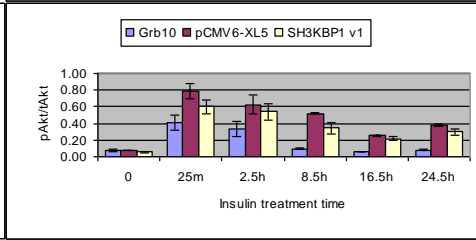

n.d.

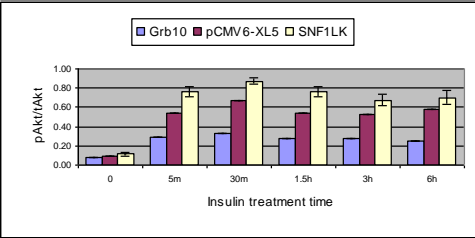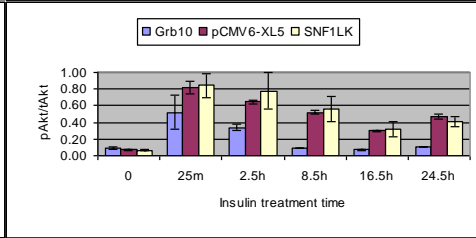

n.d.

n.d.

n.d.

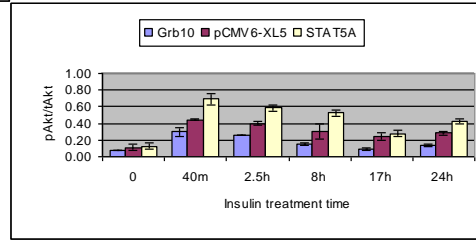

Figure S2

**Experiment 1**

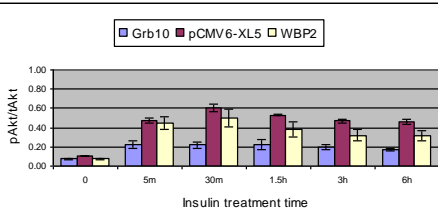

**Experiment 2**

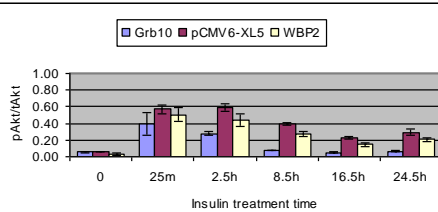

**Experiment 3/Experiment 4**

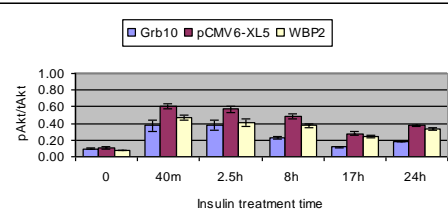

**Figure S2. Phospho-(Ser473)/Total AKT Multiplex Immunoassay Results.** As detailed in the legend for Table S3, up to three independent experiments were carried out for each cDNA whose pAKT and tAKT levels were simultaneously measured as detailed in the Methods. For comparative purposes, the computed average pAKT/tAKT ratios  $\pm$  the standard deviations for the indicated time-points from each independent experiment performed on an individual cDNA (in yellow; listed in alphabetical order) are plotted relative to the corresponding microplate values obtained with the negative vector control, pCMV6-XL5 (in red), and the positive control, Grb10 (in blue). n.d., not determined.
