# Supplementary material for: Negative Regulators of Insulin Signaling Revealed in a Genome-Wide Functional Screen
Source: PubMed Central journal article supplement (PMC2731165; doi:10.1371/journal.pone.0006871), 2009-09-03
Supplement: pone.0006871.s003.pdf [file pone.0006871.s003.pdf]

**Table S1. Summary of the first cell-based follow-up assay.** Data obtained and analyzed as described in the legend to figure 2a.

| Symbol+variant | Other Aliases:                                                                    | Updated Accession | Ratio | Stdev | P_val  |
|----------------|-----------------------------------------------------------------------------------|-------------------|-------|-------|--------|
| ABR v1         | MDB                                                                               | NM_021962         | 0.31  | 0.04  | 0.0022 |
| ATF1           | TREB36                                                                            | NM_005171         | 0.28  | 0.04  | 0.0064 |
| BCL2L1 v1      | BCL-XL/S, BCL2L, BCLX, Bcl-X, DKFZp781P2092, bcl-xL, bcl-xS                       | NM_138578         | 0.27  | 0.04  | 0.0222 |
| DOK2 v1        | p56DOK, p56dok-2                                                                  | NM_003974         | 0.30  | 0.05  | 0.0071 |
| DUSP1          | CL100, HVH1, MKP-1, PTPN10                                                        | NM_004417         | 0.54  | 0.05  | 0.0001 |
| DUSP10 v1      | MKP-5, MKP5                                                                       | NM_007207         | 0.36  | 0.06  | 0.0020 |
| DUSP4 v1       | HVH2, MKP-2, MKP2, TYP                                                            | NM_001394         | 0.52  | 0.12  | 0.0021 |
| DUSP6 v1       | MKP3, PYST1                                                                       | NM_001946         | 0.63  | 0.06  | 0.0001 |
| DUSP7          | MKP-X, MKPX, PYST2                                                                | NM_001947         | 0.50  | 0.10  | 0.0008 |
| FLJ21438       | FLJ00087                                                                          | XM_029084         | 0.27  | 0.03  | 0.0009 |
| FOXO3A v1      | AF6q21, DKFZp781A0677, FKHLR1, FKHLR1P2, MGC12739, MGC31925                       | NM_001455         | 0.46  | 0.13  | 0.0038 |
| Grb10          | RP23-119N24.1, 5730571D09Rik, AI325020, Meg1, mKIAA0207                           | NM_010345         | 0.70  | 0.09  | 0.0001 |
| KIAA1274       | RP11-710A11.1, PALD                                                               | NM_014431         | 0.27  | 0.05  | 0.0286 |
| MAP2K2         | MAPKK2, MEK2, MKK2, PRKMK2                                                        | NM_030662         | 0.24  | 0.07  | 0.0412 |
| MAST3          | KIAA0561                                                                          | XM_038150         | 0.34  | 0.02  | 0.0001 |
| MAST4          | KIAA0303                                                                          | XM_291141         | 0.29  | 0.04  | 0.0019 |
| NCK2 v1        | GRB4, NCKbeta                                                                     | NM_003581         | 0.31  | 0.10  | 0.0233 |
| PEA15          | HMAT1, HUMMAT1H, MAT1, MAT1H, PEA-15, PED                                         | NM_003768         | 0.31  | 0.09  | 0.0157 |
| PIK3R1 v1      | GRB1, p85-ALPHA                                                                   | NM_181523         | 0.52  | 0.22  | 0.0162 |
| PIK3R2         | P85B, p85-BETA                                                                    | NM_005027         | 0.62  | 0.08  | 0.0001 |
| PTEN           | BZS, MGC11227, MHAM, MMAC1, PTEN1, TEP1                                           | NM_000314         | 0.35  | 0.04  | 0.0001 |
| PTPRA v1       | RP4-534B8.1, HEPTP, HLPR, HPTPA, HPTPalpha, LRP, PTPA, PTPRL2, R-PTP-alpha, RPTPA | NM_002836         | 0.24  | 0.04  | 0.0161 |
| PTPRA v2       | RP4-534B8.1, HEPTP, HLPR, HPTPA, HPTPalpha, LRP, PTPA, PTPRL2, R-PTP-alpha, RPTPA | NM_080840         | 0.33  | 0.04  | 0.0005 |
| PTPRE v1       | DKFZp313F1310, HPTPE, PTPE, R-PTP-EPSILON                                         | NM_006504         | 0.55  | 0.07  | 0.0001 |
| PTPRE v2       | DKFZp313F1310, HPTPE, PTPE, R-PTP-EPSILON                                         | NM_130435         | 0.50  | 0.11  | 0.0009 |
| PTPRR v1       | DKFZp781C1038, EC-PTP, PCPTP1, PTP-SL, PTPBR7, PTPRQ                              | NM_002849         | 0.29  | 0.05  | 0.0029 |
| PTPRR v2       | DKFZp781C1038, EC-PTP, PCPTP1, PTP-SL, PTPBR7, PTPRQ                              | NM_130846         | 0.30  | 0.07  | 0.0091 |
| RASA1 v1       | CMAVM, DKFZp434N071, GAP, PKWS, RASA, RASGAP, p120GAP                             | NM_002890         | 0.34  | 0.04  | 0.0003 |
| RPS6KA1 v1     | HU-1, MAPKAPK1A, RSK, RSK1, S6K-alpha 1                                           | NM_002953         | 0.42  | 0.08  | 0.0006 |
| RPS6KA2 v1     | HU-2, MAPKAPK1C, RSK, RSK3, S6K-alpha, S6K-alpha2, p90-RSK2, pp90RSK3             | NM_021135         | 0.31  | 0.10  | 0.0226 |
| SASH1          | KIAA0790, RP3-323M4.1, dJ323M4.1                                                  | NM_015278         | 0.31  | 0.03  | 0.0002 |
| SH3BP1         |                                                                                   | NM_018957         | 0.29  | 0.07  | 0.0110 |
| SH3KBP1 v1     | CIN85, MIG18                                                                      | NM_031892         | 0.31  | 0.05  | 0.0011 |
| WBP2           | MGC18269, WBP-2                                                                   | NM_012478         | 0.21  | 0.01  | 0.0122 |
| C7orf27        | MGC22916                                                                          | NM_152743         | 0.23  | 0.02  | 0.0440 |
| CREB1 vB       | CREB, MGC9284                                                                     | NM_134442         | 0.37  | 0.03  | 0.0001 |
| CRTC2          | RP11-422P24.6, TORC2                                                              | NM_181715         | 0.34  | 0.05  | 0.0005 |
| FLJ22318       | DKFZp434K0926                                                                     | NM_022762         | 0.24  | 0.04  | 0.0132 |
| KIAA0672       |                                                                                   | NM_014859         | 0.27  | 0.04  | 0.0030 |
| KIAA0980       | RP4-691N24.1, FLJ11792, KIAA0980, NLP, dJ691N24.1                                 | NM_025176         | 0.24  | 0.05  | 0.0214 |
| KIAA1102       | DKFZp686B2470, DKFZp78111455, MGC72127                                            | NM_014988         | 0.25  | 0.07  | 0.0418 |
| KLHDC1         | MST025                                                                            | NM_172193         | 0.21  | 0.01  | 0.0125 |
| LOC440259      |                                                                                   | XM_496056         | 0.23  | 0.03  | 0.0107 |
| PTPRO v4       | GLEPP1, PTP-U2, PTPU2                                                             | NM_030668         | 0.29  | 0.06  | 0.0063 |
| SNF1LK         | MSK, SIK                                                                          | NM_173354         | 0.30  | 0.05  | 0.0020 |
| STAT5A         | MGF, STAT5                                                                        | NM_003152         | 0.24  | 0.06  | 0.0380 |
| K-ALPHA-1      | $\alpha$ -tubulin                                                                 | NM_006082         | 0.15  | 0.03  | 1.0000 |
| ANKRD44        | MGC21968, MGC70444                                                                | NM_153697         | 0.19  | 0.05  | 0.2016 |
| C10orf30       | FLJ40283, MGC35247                                                                | NM_152751         | 0.13  | 0.03  | 0.4023 |
| C18orf25 v1    | ARKL1, MGC12909, MGC87799                                                         | NM_145055         | 0.21  | 0.03  | 0.3406 |
| CARF           | FLJ20036                                                                          | NM_017632         | 0.27  | 0.09  | 0.1382 |
| DACH2          | RP11-345E19.1, FLJ31391                                                           | NM_053281         | 0.17  | 0.05  | 0.5791 |
| DEF6           | IBP                                                                               | NM_022047         | 0.15  | 0.02  | 0.9433 |
| DGKZ v2        | DAGK5, DAGK6, DGK-ZETA, hDGKzeta                                                  | NM_003646         | 0.20  | 0.04  | 0.1007 |
| DUSP5          | DUSP, HVH3                                                                        | NM_004419         | 0.33  | 0.15  | 0.0538 |
| EFHD1          | DKFZp781H0842, FLJ13612, MST133, MSTP133, PP3051                                  | NM_025202         | 0.26  | 0.08  | 0.1234 |
| empty          |                                                                                   |                   | 0.15  | 0.02  | 0.7485 |
| FAM49A         | DKFZP566A1524, FLJ11080                                                           | NM_030797         | 0.21  | 0.03  | 0.4345 |
| FLJ10159       |                                                                                   | NM_018013         | 0.17  | 0.01  | 0.2022 |
| FLJ13841       |                                                                                   | NM_024702         | 0.19  | 0.03  | 0.0835 |
| FLJ22965       |                                                                                   | NM_022101         | 0.17  | 0.03  | 0.2653 |
| FLJ34187       |                                                                                   | AK091506          | 0.20  | 0.04  | 0.1166 |
| GPATC4 v2      |                                                                                   | NM_182679         | 0.11  | 0.02  | 0.0718 |
| ITPK1          | ITRPK1                                                                            | NM_014216         | 0.20  | 0.05  | 0.1394 |
| LOC150223 v2   |                                                                                   | NM_001017965      | 0.20  | 0.08  | 0.2529 |

**Table S1 (cont). Summary of the first cell-based follow-up assay.** Data obtained and analyzed as described in the legend to figure 2a.

| <u>Symbol+variant</u> | <u>Other Aliases:</u>              | <u>Updated Accession</u> | <u>Ratio</u> | <u>Stdev</u> | <u>P val</u> |
|-----------------------|------------------------------------|--------------------------|--------------|--------------|--------------|
| MICAL-L1              | DKFZp686M2226, KIAA1668, MIRAB13   | NM_033386                | 0.19         | 0.04         | 0.1195       |
| NUDCD3                | KIAA1068                           | NM_015332                | 0.19         | 0.05         | 0.1953       |
| pCMV6-XL5             |                                    | AF067196                 | 0.19         | 0.03         | 0.0924       |
| POGK                  | BASS2, KIAA1513, KIAA15131, LST003 | NM_017542                | 0.15         | 0.03         | 0.9482       |
| SIAH1 v1              | HUMSIAH, Siah-1, Siah-1a, hSIAH1   | NM_003031                | 0.47         | 0.34         | 0.1035       |
| SIRT2 v2              | SIR2L, SIR2L2                      | NM_030593                | 0.16         | 0.03         | 0.5184       |
| TTLL5                 | KIAA0998                           | NM_015072                | 0.16         | 0.03         | 0.6292       |
| ZBTB9                 | MGC23166                           | NM_152735                | 0.14         | 0.03         | 0.7085       |
| ZNF385                | DKFZP586G1122, HZF, RZF, ZFP385    | NM_015481                | 0.20         | 0.04         | 0.0757       |
