# Supplementary material for: Negative Regulators of Insulin Signaling Revealed in a Genome-Wide Functional Screen
Source: PubMed Central journal article supplement (PMC2731165; doi:10.1371/journal.pone.0006871), 2009-09-03
Supplement: pone.0006871.s004.pdf [file pone.0006871.s004.pdf]

**Table S2. Summary of the second cell-based follow-up assay.** Data obtained and analyzed as described in the legend to figure 2b.

| <u>Symbol+variant</u> | <u>Other Aliases:</u>                                                             | <u>Updated Accession</u> | <u>Ratio</u> | <u>Stdev</u> | <u>P val</u> |
|-----------------------|-----------------------------------------------------------------------------------|--------------------------|--------------|--------------|--------------|
| ABR v1                | MDB                                                                               | NM_021962                | 0.83         | 0.20         | 0.0048       |
| ATF1                  | TREB36                                                                            | NM_005171                | 0.49         | 0.06         | 0.0392       |
| BCL2L1 v1             | BCL-XL/S, BCL2L, BCLX, Bcl-X, DKFZp781P2092, bcl-xL, bcl-xS                       | NM_138578                | 0.53         | 0.11         | 0.0359       |
| DOK2 v1               | p56DOK, p56dok-2                                                                  | NM_003974                | 0.64         | 0.10         | 0.0074       |
| DUSP1                 | CL100, HVH1, MKP-1, PTPN10                                                        | NM_004417                | 0.79         | 0.09         | 0.0013       |
| DUSP10 v1             | MKP-5, MKP5                                                                       | NM_007207                | 0.89         | 0.09         | 0.0006       |
| DUSP4 v1              | HVH2, MKP-2, MKP2, TYP                                                            | NM_001394                | 0.67         | 0.25         | 0.0332       |
| DUSP6 v1              | MKP3, PYST1                                                                       | NM_001946                | 0.85         | 0.17         | 0.0024       |
| DUSP7                 | MKP-X, MKPX, PYST2                                                                | NM_001947                | 0.62         | 0.18         | 0.0273       |
| FLJ21438              | FLJ00087                                                                          | XM_029084                | 0.60         | 0.06         | 0.0079       |
| FOXO3A v1             | AF6q21, DKFZp781A0677, FKHRL1, FKHRL1P2, MGC12739, MGC31925                       | NM_001455                | 0.71         | 0.06         | 0.0024       |
| Grb10                 | RP23-119N24.1, 5730571D09Rik, AI325020, Meg1, mKIAA0207                           | NM_010345                | 0.99         | 0.17         | 0.0008       |
| KIAA1274              | RP11-710A11.1, PALD                                                               | NM_014431                | 0.54         | 0.07         | 0.0219       |
| MAP2K2                | MAPKK2, MEK2, MKK2, PRKMK2                                                        | NM_030662                | 0.50         | 0.06         | 0.0328       |
| MAST3                 | KIAA0561                                                                          | XM_038150                | 0.52         | 0.04         | 0.0226       |
| MAST4                 | KIAA0303                                                                          | XM_291141                | 0.52         | 0.10         | 0.0355       |
| NCK2 v1               | GRB4, NCKbeta                                                                     | NM_003581                | 0.65         | 0.09         | 0.0059       |
| PEA15                 | HMAT1, HUMMAT1H, MAT1, MAT1H, PEA-15, PED                                         | NM_003768                | 0.63         | 0.14         | 0.0151       |
| PIK3R1 v1             | GRB1, p85-ALPHA                                                                   | NM_181523                | 0.54         | 0.07         | 0.0201       |
| PIK3R2                | P85B, p85-BETA                                                                    | NM_005027                | 0.60         | 0.15         | 0.0240       |
| PTEN                  | BZS, MGC11227, MHAM, MMAC1, PTEN1, TEP1                                           | NM_000314                | 0.61         | 0.08         | 0.0105       |
| PTPRA v1              | RP4-534B8.1, HEPTP, HLPR, HPTPA, HPTPalpha, LRP, PTPA, PTPRL2, R-PTP-alpha, RPTPA | NM_002836                | 0.53         | 0.09         | 0.0277       |
| PTPRA v2              | RP4-534B8.1, HEPTP, HLPR, HPTPA, HPTPalpha, LRP, PTPA, PTPRL2, R-PTP-alpha, RPTPA | NM_080840                | 0.65         | 0.18         | 0.0193       |
| PTPRE v1              | DKFZp313F1310, HPTPE, PTPE, R-PTP-EPSILON                                         | NM_006504                | 0.58         | 0.07         | 0.0113       |
| PTPRE v2              | DKFZp313F1310, HPTPE, PTPE, R-PTP-EPSILON                                         | NM_130435                | 0.73         | 0.17         | 0.0072       |
| PTPRR v1              | DKFZp781C1038, EC-PTP, PCPTP1, PTP-SL, PTPBR7, PTPRQ                              | NM_002849                | 0.64         | 0.07         | 0.0055       |
| PTPRR v2              | DKFZp781C1038, EC-PTP, PCPTP1, PTP-SL, PTPBR7, PTPRQ                              | NM_130846                | 0.59         | 0.06         | 0.0090       |
| RASA1 v1              | CMAVM, DKFZp434N071, GAP, PKWS, RASA, RASGAP, p120GAP                             | NM_002890                | 0.61         | 0.07         | 0.0079       |
| RPS6KA1 v1            | HU-1, MAPKAPK1A, RSK, RSK1, S6K-alpha 1                                           | NM_002953                | 0.67         | 0.18         | 0.0164       |
| RPS6KA2 v1            | HU-2, MAPKAPK1C, RSK, RSK3, S6K-alpha, S6K-alpha2, p90-RSK2, pp90RSK3             | NM_021135                | 0.80         | 0.16         | 0.0034       |
| SASH1                 | KIAA0790, RP3-323M4.1, dJ323M4.1                                                  | NM_015278                | 0.53         | 0.07         | 0.0244       |
| SH3BP1                |                                                                                   | NM_018957                | 0.58         | 0.10         | 0.0163       |
| SH3KBP1 v1            | CIN85, MIG18                                                                      | NM_031892                | 0.63         | 0.10         | 0.0082       |
| WBP2                  | MGC18269, WBP-2                                                                   | NM_012478                | 0.51         | 0.04         | 0.0275       |
| C7orf27               | MGC22916                                                                          | NM_152743                | 0.40         | 0.05         | 0.1579       |
| CREB1 vB              | CREB, MGC9284                                                                     | NM_134442                | 0.40         | 0.05         | 0.1619       |
| CRTC2                 | RP11-422P24.6, TORC2                                                              | NM_181715                | 0.40         | 0.08         | 0.1798       |
| FLJ22318              | DKFZp434K0926                                                                     | NM_022762                | 0.36         | 0.09         | 0.3050       |
| KIAA0672              |                                                                                   | NM_014859                | 0.48         | 0.15         | 0.0971       |
| KIAA0980              | RP4-691N24.1, FLJ11792, KIAA0980, NLP, dJ691N24.1                                 | NM_025176                | 0.41         | 0.04         | 0.1320       |
| KIAA1102              | DKFZp686B2470, DKFZp781I1455, MGC72127                                            | NM_014988                | 0.41         | 0.06         | 0.1440       |
| KLHDC1                | MST025                                                                            | NM_172193                | 0.41         | 0.04         | 0.1211       |
| LOC440259             |                                                                                   | XM_496056                | 0.50         | 0.11         | 0.0519       |
| PTPRO v4              | GLEPP1, PTP-U2, PTPU2                                                             | NM_030668                | 0.44         | 0.10         | 0.1133       |
| SNF1LK                | MSK, SIK                                                                          | NM_173354                | 0.25         | 0.04         | 0.9000       |
| STAT5A                | MGF, STAT5                                                                        | NM_003152                | 0.45         | 0.05         | 0.0696       |
| K-ALPHA-1             | $\alpha$ -tubulin                                                                 | NM_006082                | 0.26         | 0.17         | 1.0000       |
