# Supplementary material for: Negative Regulators of Insulin Signaling Revealed in a Genome-Wide Functional Screen
Source: PubMed Central journal article supplement (PMC2731165; doi:10.1371/journal.pone.0006871), 2009-09-03
Supplement: pone.0006871.s005.pdf [file pone.0006871.s005.pdf]

**Table S3. Phospho-(Ser473)/Total AKT Multiplex Immunoassay Data.** Shown here are the raw pAKT and tAKT data sets as well as the calculated pAKT/tAKT ratios for each of the selected screen hits (listed in alphabetical order) that were assayed as detailed in the Methods. The four independent experiments that were performed are color-coded with additional specific time-course differences indicated in the table heading. The "0" time-point corresponds to no insulin treatment while the insulin (50 nM) treatment times are indicated in minutes (m) and hours (h). Generally, for each time- point examined two or three replicates were performed per experiment and up to three independent experiments were carried out for each assayed cDNA. For comparative purposes, the computed average pAKT/tAKT ratios  $\pm$  the standard deviations for the indicated time-points from each independent experiment performed on an individual cDNA are plotted in Figure S2 relative to the corresponding microplate values obtained with the negative vector control, pCMV6-XL5, and the positive control, Grb10.
